# Supplementary material for: EARLY FLOWERING 3 and Photoperiod Sensing in Brachypodium distachyon
Source: PubMed Central journal article supplement (PMC8770904; doi:10.3389/fpls.2021.769194), 2022-01-06
Supplement: Table_1.pdf [file Table_1.pdf]

**Table S1.** Primers used in this study.

| Purpose    | Gene name       | Gene ID      | Primer                   | Sequence                  | Amplicon size                                     | Reference             |
|------------|-----------------|--------------|--------------------------|---------------------------|---------------------------------------------------|-----------------------|
| RT-qPCR    | BdCCA1 (=BdLHY) | Bradi3g16515 | FOR                      | AGCTTGGCAGCGCATAGAAGAG    | 64                                                | Woods et al., 2014    |
|            |                 |              | REV                      | AGCATGGCTTCTGATTTGCACAG   |                                                   |                       |
|            | BdGI            | Bradi2g05226 | FOR                      | GCATCTCCCGAAATGCAGATGTC   | 79                                                | Woods et al., 2014    |
|            |                 |              | REV                      | CACAAAGCGCATCTACAACCTTTC  |                                                   |                       |
|            | BdPPD1          | Bradi1g16490 | FOR                      | CGATAATGGCAGTGGCACCCAAAG  | 63                                                | Woods et al., 2014    |
|            |                 |              | REV                      | TGTGGGCTGTCAATCTCCACAC    |                                                   |                       |
|            | BdVRN1          | Bradi1g08340 | FOR                      | GTCGCGCTCATCATCTTCTC      | 102                                               | Schwartz et al., 2010 |
|            |                 |              | REV                      | TGCATAGGAGTAGCGCTCATAG    |                                                   |                       |
|            | BdVRN2          | Bradi3g10010 | FOR                      | ATGCATGAGAGAGAGGCGAAGG    | 80                                                | Ream et al., 2014     |
| REV        |                 |              | TCGTAGCGGATCTGCTTCTCGTAG |                           |                                                   |                       |
| BdFT1      | Bradi1g48830    | FOR          | TTCGGGAACAGGAACGTGTCCAAC | 129                       | Ream et al., 2014                                 |                       |
|            |                 | REV          | AGCATCTGGGTCTACCATCACGAG |                           |                                                   |                       |
| BdFTL9     | Bradi2g49795    | FOR          | GACAACTGGAGCTAGCTTTGGC   | 74                        | Woods et al., 2019                                |                       |
|            |                 | REV          | TGCGATGGATGCCGATTCTTGG   |                           |                                                   |                       |
| BdUBC18    | Bradi4g00660    | FOR          | GTCACCCGCAATGACTGTAAGTTC | 87                        | Ream et al., 2014                                 |                       |
|            |                 | REV          | TTGTCTTGCGGACGTTGCTTTG   |                           |                                                   |                       |
| BdACT3     | Bradi4g41850    | FOR          | CCTGAAGTCCTTTCCAGC       | 121                       | Li et al., 2011                                   |                       |
|            |                 | REV          | AGGGCAGTGATCTCCTTGC      |                           |                                                   |                       |
| Genotyping | Genomic ELF3    | Bradi2g14290 | FOR                      | GGTGGTTTCAGCTTCTGCAGGTGAA | WT sequence cut by hpy166 but not the elf3 mutant | This article          |
|            |                 |              | REV                      | TCGCTGTCCCTAGATGCGTGGAATC |                                                   |                       |
|            | UBI:ELF3        | Bradi2g14290 | FOR                      | CACCCATGCCTCCAATGTACTTCCC | 615                                               | This article          |
|            |                 |              | REV                      | ATCATGCGATCATAGGCGTC      |                                                   |                       |

## References

Li W (2011) Cloning and functional analysis of VRT2-like Genes in *Brachypodium distachyon* L. Tai'an, China: Shandong Agricultural University. 76 p.

Schwartz, C. J., Doyle, M. R., Manzaneda, A. J., Rey, P. J., Mitchell-Olds, T., and Amasino, R. M. (2010). Natural Variation of Flowering Time and Vernalization Responsiveness in *Brachypodium distachyon*. *Bioenerg Res* 3, 38–46. doi:10.1007/s12155-009-9069-3.

Ream, T. S., Woods, D. P., Schwartz, C. J., Sanabria, C. P., Mahoy, J. A., Walters, E. M., et al. (2014). Interaction of Photoperiod and Vernalization Determines Flowering Time of *Brachypodium distachyon*. *Plant Physiol* 164, 694–709. doi:10.1104/pp.113.232678.

Woods, D. P., Ream, T. S., Minevich, G., Hobert, O., and Amasino, R. M. (2014). PHYTOCHROME C Is an Essential Light Receptor for Photoperiodic Flowering in the Temperate Grass, *Brachypodium distachyon*. *Genetics* 198, genetics.114.166785. doi:10.1534/genetics.114.166785.

Woods, D., Dong, Y., Bouche, F., Bednarek, R., Rowe, M., Ream, T., et al. (2019). A florigen paralog is required for short-day vernalization in a pooid grass. *Elife* 8, e42153. doi:10.7554/elife.42153.
